# Supplementary material
Source: PubMed Central journal article supplement (PMC124962)

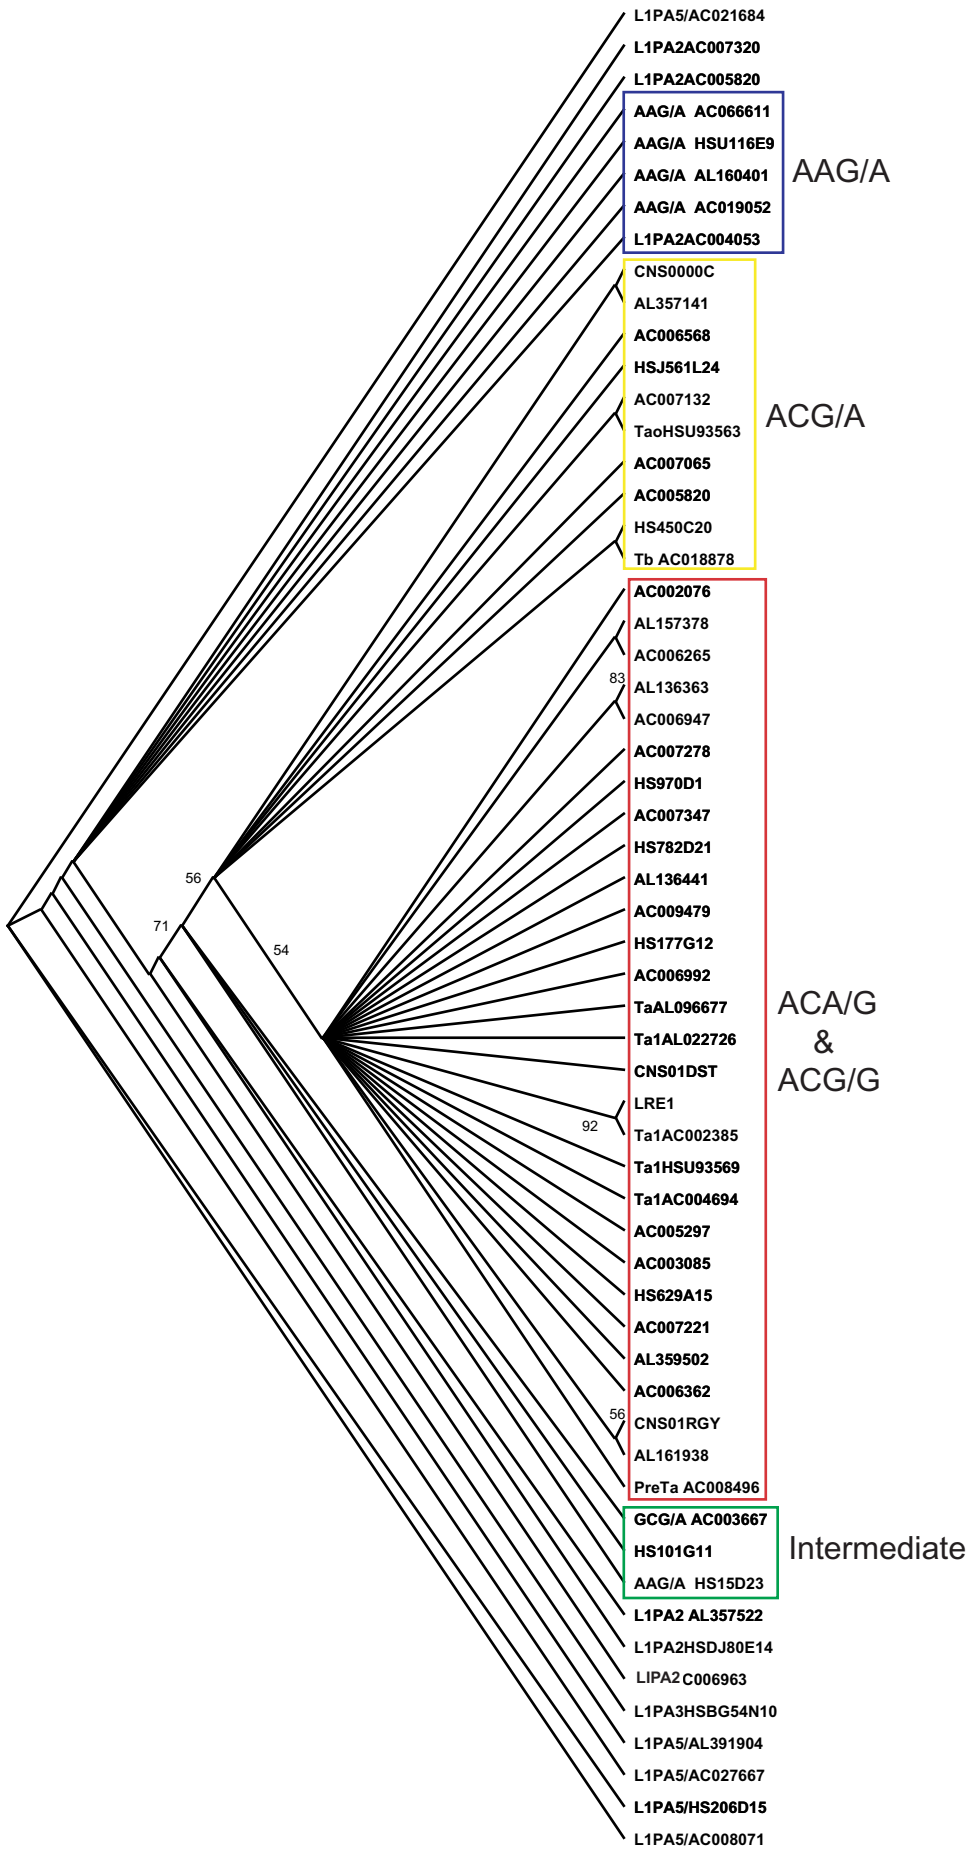

Supplement: pnas_152346799_2.pdf [file pnas_152346799_2.pdf]
